# Supplementary material for: Museomics of a rare taxon: placing Whalleyanidae in the Lepidoptera Tree of Life
Source: bioRxiv or medRxiv preprint supplement (doi:10.1101/2020.08.18.255182), 2020-08-18
Supplement: Supplementary file [file media-1.pdf]

**Table S1:** Library Preparation Reagents, Supplier and product code.

| <b>Reagent or Resource</b>       | <b>Source</b>      | <b>Product Code</b> |
|----------------------------------|--------------------|---------------------|
| QIAamp DNA Micro Kit             | Qiagen             | 56304               |
| SYBR safe                        | Fisher Scientific  | S33102              |
| 10X Buffer Tango                 | Fisher Scientific  | 11541505            |
| dNTP                             | Sigma-Aldrich      | DNTP100-KT          |
| ATP                              | Sigma-Aldrich      | 11140965001         |
| T4 DNA Polymerase                | New England Biolab | M0203S              |
| T4 Polynucleotide Kinase         | New England Biolab | M0201S              |
| Min Elute PCR purification Kit   | Qiagen             | 28006               |
| T4 DNA Ligase                    | New England Biolab | M0202               |
| PEG-4000                         | Sigma-Aldrich      | 1546569-1G          |
| Bst 2.0 WarmStart DNA Polymerase | New England Biolab | M0538S              |
| Accuprime Pfx DNA Polymerase     | Fisher Scientific  | 12344024            |
| Agencourt AMPure XP              | Beckman Coulter    | A63880              |
| Tween20                          | Sigma-Aldrich      | P9416               |
| EDTA                             | Fisher Scientific  | 15575020            |
| Tris-Cl pH8                      | Fisher Scientific  | 10259194            |
| TE buffer                        | Sigma-Aldrich      | 93283-100mL         |
| NaCl solution                    | Sigma-Aldrich      | 71386-1L            |

**Table S2:** Complete list of taxa included in the analysis

| <b>Code</b> | <b>Superfamily</b> | <b>Family</b> | <b>Genus</b> | <b>Species</b> | <b>NCBI accession</b> | <b>Type of data</b> |
|-------------|--------------------|---------------|--------------|----------------|-----------------------|---------------------|
| NW_T143     | Bombycoidea        | Apatelodidae  | Apatelodes   | pithala        | SRR1794084            | Transcriptome       |
| NW_G003     | Bombycoidea        | Bombycidae    | Bombyx       | mori           | GCF_000151625.1       | Genome              |
| NW_T076     | Bombycoidea        | Saturniidae   | Actias       | luna           | SRR1002974            | Transcriptome       |
| NW_T134     | Bombycoidea        | Saturniidae   | Antheraea    | yamamai        | SRR1743839            | Transcriptome       |
| NW_T195     | Bombycoidea        | Saturniidae   | Attacus      | atlas          | SRR1002994            | Transcriptome       |
| NW_T077     | Bombycoidea        | Saturniidae   | Eacles       | imperialis     | SRR1299435            | Transcriptome       |
| NW_T131     | Bombycoidea        | Saturniidae   | Rhodinia     | newara         | SRR1743843            | Transcriptome       |
| NW_T130     | Bombycoidea        | Saturniidae   | Samia        | ricini         | SRR1743841            | Transcriptome       |
| NW_T078     | Bombycoidea        | Saturniidae   | Therinia     | lactucina      | SRR1299418            | Transcriptome       |
| NW_T080     | Bombycoidea        | Sphingidae    | Adhemarius   | daphne         | SRR1299394            | Transcriptome       |
| NW_T196     | Bombycoidea        | Sphingidae    | Ceratomia    | undulosa       | SRR1002985            | Transcriptome       |
| NW_T197     | Bombycoidea        | Sphingidae    | Darapsa      | myron          | SRR1002986            | Transcriptome       |
| NW_T081     | Bombycoidea        | Sphingidae    | Enyo         | lugubris       | SRR1002983            | Transcriptome       |
| NW_T082     | Bombycoidea        | Sphingidae    | Hemaris      | diffinis       | SRR1002987            | Transcriptome       |
| NW_G002     | Bombycoidea        | Sphingidae    | Manduca      | sexta          | GCF_000262585.1       | Genome              |
| NW_T083     | Bombycoidea        | Sphingidae    | Xylophanes   | tersa          | SRR1298384            | Transcriptome       |
| NW_T005     | Calliduloidea      | Callidulidae  | Pterodecta   | felderi        | SRR1299369            | Transcriptome       |
| VT56        | Calliduloidea      | Callidulidae  | Helicomitra  | pulchra        | SRR11799524           | Genome              |
| VT58        | Calliduloidea      | Callidulidae  | Griveaudia   | vieui          | SRR11799526           | Genome              |
| NW_T108     | Carposinoidea      | Carposinidae  | Carposina    | sasakii        | GADL00000000          | Transcriptome       |
| NW_T001     | Choreutoidea       | Choreutidae   | Hemerophila  | diva           | SRR1005851            | Transcriptome       |
| NW_T006     | Cossoidea          | Castniidae    | Synemon      | plana          | SRR1006158            | Transcriptome       |
| NW_T200     | Cossoidea          | Castniidae    | Telchin      | licus          | SRR1204999            | Transcriptome       |
| NW_T049     | Cossoidea          | Cossidae      | Culama       | ANIC3          | SRR1006166            | Transcriptome       |
| NW_T222     | Cossoidea          | Cossidae      | Eogystia     | hippophaecolus | SRR4409152            | Transcriptome       |
| NW_T007     | Cossoidea          | Cossidae      | Givira       | mucidus        | SRR1006184            | Transcriptome       |
| NW_T008     | Cossoidea          | Cossidae      | Morpheis     | mathani        | SRR1299214            | Transcriptome       |
| NW_T050     | Cossoidea          | Cossidae      | Prionoxystus | robiniae       | SRR1006187            | Transcriptome       |

|         |                 |                |                |                 |                                          |               |
|---------|-----------------|----------------|----------------|-----------------|------------------------------------------|---------------|
| NW_T183 | Cossoidea       | Cossidae       | Psychogena     | miranda         | SRR1006219                               | Transcriptome |
| NW_T052 | Cossoidea       | Cossidae       | Spinulata      | maruga          | SRR1006227                               | Transcriptome |
| NW_T009 | Cossoidea       | Dudgeoneidae   | Archaeoses     | polygrapha      | SRR1021600                               | Transcriptome |
| NW_T010 | Cossoidea       | Sesiidae       | Podosesia      | syringae        | SRR1021623                               | Transcriptome |
| NW_T079 | Cossoidea       | Sesiidae       | Vitacea        | polistiformis   | SRR1021630                               | Transcriptome |
| NW_T012 | Drepanoidea     | Cimeliidae     | Axia           | margarita       | SRR1006157                               | Transcriptome |
| NW_T011 | Drepanoidea     | Doidae         | Doa            | Janzen01        | SRR1021609                               | Transcriptome |
| NW_T054 | Drepanoidea     | Drepanidae     | Cyclidia       | substigmata     | SRR1021608                               | Transcriptome |
| NW_T013 | Drepanoidea     | Drepanidae     | Pseudothyatira | cymatophoroides | SRR1021621                               | Transcriptome |
| NW_T048 | Gelechioidea    | Depressariidae | Psilocorsis    | reflexella      | SRR1021624                               | Transcriptome |
| NW_T016 | Gelechioidea    | Depressariidae | Tonica         | nigricostella   | SRR1299773                               | Transcriptome |
| NW_T015 | Gelechioidea    | Elachistidae   | Antaeotricha   | schlaegeri      | SRR1021598                               | Transcriptome |
| NW_T057 | Gelechioidea    | Gelechiidae    | Dichomeris     | punctidiscella  | SRR1021607                               | Transcriptome |
| NW_T203 | Gelechioidea    | Gelechiidae    | Pectinophora   | gossypiella     | SRR2225787;<br>SRR2225788;<br>SRR2225790 | Transcriptome |
| NW_T125 | Gelechioidea    | Gelechiidae    | Tuta           | absoluta        | SRR1721964                               | Transcriptome |
| NW_T066 | Gelechioidea    | Lecithoceridae | Thubana        | sp.             | SRR1300991                               | Transcriptome |
| NW_T014 | Geometroidea    | Epicopeiidae   | Epicopeia      | hainseii        | SRR1021610                               | Transcriptome |
| NW_T017 | Geometroidea    | Geometridae    | Biston         | betularia       | SRR1021599                               | Transcriptome |
| NW_T202 | Geometroidea    | Geometridae    | Biston         | suppressaria    | SRR1777716                               | Transcriptome |
| NW_T058 | Geometroidea    | Geometridae    | Chlorosea      | margaretaria    | SRR1021603                               | Transcriptome |
| NW_T153 | Geometroidea    | Geometridae    | Ectropis       | obliqua         | SRR3056076                               | Transcriptome |
| NW_T059 | Geometroidea    | Geometridae    | Idaea          | eremiata        | SRR1021615                               | Transcriptome |
| NW_T060 | Geometroidea    | Geometridae    | Macaria        | distribuaria    | SRR1299213                               | Transcriptome |
| NW_T061 | Geometroidea    | Geometridae    | Nemoria        | lixaria         | SRR1299347                               | Transcriptome |
| NW_T018 | Geometroidea    | Sematuridae    | Mania          | lunus           | SRR1299318                               | Transcriptome |
| NW_T085 | Geometroidea    | Uraniidae      | Calledapteryx  | dryopterata     | SRR1021601                               | Transcriptome |
| NW_T019 | Geometroidea    | Uraniidae      | Lyssa          | zampa           | SRR1299769                               | Transcriptome |
| NW_T142 | Gracillarioidea | Gracillariidae | Acrocercops    | transecta       | DRR023321                                | Transcriptome |
| NW_T146 | Gracillarioidea | Gracillariidae | Caloptilia     | triadicae       | SRR1794032                               | Transcriptome |

|         |                 |                |               |                  |                 |               |
|---------|-----------------|----------------|---------------|------------------|-----------------|---------------|
| NW_T087 | Gracillarioidea | Gracillariidae | Cameraria     | ohridella        | SRR1190496      | Genome        |
| NW_T020 | Gracillarioidea | Gracillariidae | Phyllocnistis | citrella         | SRR1299751      | Transcriptome |
| VT57    | Hyblaeoidea     | Hyblaeidae     | Hyblaea       | madagascariensis | SRR11799525     | Genome        |
| MM07227 | Hyblaeoidea     | Hyblaeidae     | Hyblaea       | puera            | SRR11799522     | Genome        |
| NW_T023 | Immoidea        | Immidae        | Imma          | tetrascia        | SRR1021616      | Transcriptome |
| NW_T064 | Lasiocampoidea  | Lasiocampidae  | Artace        | sp.              | SRR1299316      | Transcriptome |
| NW_T151 | Lasiocampoidea  | Lasiocampidae  | Dendrolimus   | houi             | SRR944675       | Transcriptome |
| NW_T152 | Lasiocampoidea  | Lasiocampidae  | Dendrolimus   | punctatus        | SRR2641162      | Transcriptome |
| NW_T065 | Lasiocampoidea  | Lasiocampidae  | Tolype        | notialis         | SRR1021628      | Transcriptome |
| NW_T025 | Mimallonoidea   | Mimallonidae   | Lacosoma      | chiridota        | SRR1021619      | Transcriptome |
| NW_T024 | Mimallonoidea   | Mimallonidae   | Lacosoma      | ludolpha         | SRR1299212      | Transcriptome |
| NW_T144 | Noctuoidea      | Erebidae       | Arctia        | plantaginis      | ERR1856313      | Transcriptome |
| NW_T026 | Noctuoidea      | Erebidae       | Eudocima      | salaminia        | SRR1300148      | Transcriptome |
| NW_T156 | Noctuoidea      | Erebidae       | Euproctis     | chrysorrhoea     | SRR1040496      | Transcriptome |
| NW_T027 | Noctuoidea      | Erebidae       | Lymantria     | dispar           | SRR1021618      | Transcriptome |
| NW_T056 | Noctuoidea      | Euteliidae     | Anigraea      | rubida           | SRR1299755      | Transcriptome |
| NW_T106 | Noctuoidea      | Noctuidae      | Agrotis       | segetum          | GBCW00000000    | Transcriptome |
| NW_T107 | Noctuoidea      | Noctuidae      | Athetis       | lepigone         | GARD00000000    | Transcriptome |
| NW_T148 | Noctuoidea      | Noctuidae      | Chrysodeixis  | includens        | SRR2049082      | Transcriptome |
| NW_T069 | Noctuoidea      | Noctuidae      | Helicoverpa   | zea              | SRR1021614      | Transcriptome |
| NW_T163 | Noctuoidea      | Noctuidae      | Heliothis     | subflexa         | ERR738599       | Transcriptome |
| NW_T224 | Noctuoidea      | Noctuidae      | Mythimna      | separata         | SRR5115697      | Transcriptome |
| NW_T173 | Noctuoidea      | Erebidae       | Oraesia       | emarginata       | SRR5128005      | Transcriptome |
| NW_T187 | Noctuoidea      | Noctuidae      | Sesamia       | nonagrioides     | ERR424922       | Transcriptome |
| NW_T189 | Noctuoidea      | Noctuidae      | Spodoptera    | exigua           | SRR525279       | Transcriptome |
| NW_G008 | Noctuoidea      | Noctuidae      | Spodoptera    | frugiperda       | GCF_011064685.1 | Genome        |
| NW_T071 | Noctuoidea      | Noctuidae      | Striacosta    | albicosta        | SRR037002       | Transcriptome |
| NW_T110 | Noctuoidea      | Noctuidae      | Trichoplusia  | ni               | GBKU00000000    | Transcriptome |
| NW_T072 | Noctuoidea      | Nolidae        | Manoba        | major            | SRR1300145      | Transcriptome |
| NW_T073 | Noctuoidea      | Notodontidae   | Notoplusia    | minuta           | SRR1299746      | Transcriptome |
| NW_T092 | Noctuoidea      | Notodontidae   | Thaumetopoea  | pityocampa       | SRR1284701      | Transcriptome |

|         |                |               |              |             |                           |               |
|---------|----------------|---------------|--------------|-------------|---------------------------|---------------|
| NW_T029 | Papilionoidea  | Hedylidae     | Macrosoma    | hedylaria   | SRR1299306                | Transcriptome |
| NW_T116 | Papilionoidea  | Hesperiidae   | Erynnis      | propertius  | SRX016482                 | Transcriptome |
| NW_T041 | Papilionoidea  | Hesperiidae   | Hylephila    | phyleus     | SRR1299296                | Transcriptome |
| NW_T062 | Papilionoidea  | Hesperiidae   | Megathymus   | yuccae      | SRR1299752                | Transcriptome |
| NW_T118 | Papilionoidea  | Hesperiidae   | Thymelicus   | sylvestris  | SRR1325130                | Transcriptome |
| NW_T193 | Papilionoidea  | Hesperiidae   | Urbanus      | proteus     | SRR1794082                | Transcriptome |
| NW_T068 | Papilionoidea  | Lycaenidae    | Hemiargus    | ceraunus    | SRR1299274                | Transcriptome |
| NW_T095 | Papilionoidea  | Lycaenidae    | Polyommatus  | icarus      | SRR921636                 | Transcriptome |
| NW_T182 | Papilionoidea  | Lycaenidae    | Protantigius | superans    | SRR2441452                | Transcriptome |
| NW_T188 | Papilionoidea  | Lycaenidae    | Spindasis    | takanonis   | SRR2441453                | Transcriptome |
| NW_G004 | Papilionoidea  | Nymphalidae   | Danaus       | plexippus   | GCA_000235995.2           | Genome        |
| NW_T157 | Papilionoidea  | Nymphalidae   | Fabriciana   | nerippe     | SRR2837841                | Transcriptome |
| NW_G005 | Papilionoidea  | Nymphalidae   | Heliconius   | melpomene   | GCA_000313835.2           | Genome        |
| NW_T088 | Papilionoidea  | Nymphalidae   | Junonia      | coenia      | SRR1166409                | Transcriptome |
| NW_T090 | Papilionoidea  | Nymphalidae   | Limenitis    | arthemis    | SRR1504907                | Transcriptome |
| NW_T171 | Papilionoidea  | Nymphalidae   | Maniola      | jurtina     | SRR3721684;<br>SRR3721695 | Transcriptome |
| NW_G006 | Papilionoidea  | Nymphalidae   | Melitaea     | cinxia      | GCA_000716385.1           | Genome        |
| NW_T089 | Papilionoidea  | Nymphalidae   | Pararge      | aegeria     | SRR1190479                | Genome        |
| NW_T169 | Papilionoidea  | Papilionidae  | Luehdorfia   | chinensis   | SRR2924893                | Transcriptome |
| NW_T040 | Papilionoidea  | Papilionidae  | Papilio      | glaucus     | SRR850324                 | Transcriptome |
| NW_T074 | Papilionoidea  | Papilionidae  | Papilio      | polytes     | SRR850327                 | Transcriptome |
| NW_T098 | Papilionoidea  | Papilionidae  | Parides      | eurimedes   | SRR921629                 | Transcriptome |
| NW_T123 | Papilionoidea  | Pieridae      | Anthocharis  | cardamines  |                           | Transcriptome |
| NW_T122 | Papilionoidea  | Pieridae      | Belenois     | gidica      |                           | Transcriptome |
| NW_T121 | Papilionoidea  | Pieridae      | Delias       | nigrina     |                           | Transcriptome |
| NW_T120 | Papilionoidea  | Pieridae      | Gonepteryx   | rhamni      |                           | Transcriptome |
| NW_T179 | Papilionoidea  | Pieridae      | Pieris       | brassicae   | ERR1855021                | Transcriptome |
| NW_T181 | Papilionoidea  | Pieridae      | Pontia       | daplidice   | SRR5253669                | Transcriptome |
| NW_T039 | Papilionoidea  | Riodinidae    | Semomesia    | campanea    | SRR1299211                | Transcriptome |
| NW_T003 | Pterophoroidea | Pterophoridae | Emmelina     | monodactyla | SRR1021605                | Transcriptome |

|         |                |               |                |                 |                                          |               |
|---------|----------------|---------------|----------------|-----------------|------------------------------------------|---------------|
| NW_T002 | Pterophoroidea | Pterophoridae | Lantanophaga   | pusillidactyla  | SRR1299210                               | Transcriptome |
| NW_T037 | Pyraloidea     | Crambidae     | Catoptria      | oregonicus      | SRR1021602                               | Transcriptome |
| NW_G007 | Pyraloidea     | Crambidae     | Chilo          | suppressalis    | GCA_004000445.1                          | Genome        |
| NW_T053 | Pyraloidea     | Crambidae     | Cnaphalocrocis | medinalis       | SRR647915                                | Transcriptome |
| NW_T158 | Pyraloidea     | Crambidae     | Glyphodes      | pyloalis        | SRR5520571                               | Transcriptome |
| NW_T159 | Pyraloidea     | Crambidae     | Haritalodes    | derogata        | SRR2017609                               | Transcriptome |
| NW_T168 | Pyraloidea     | Crambidae     | Leucinodes     | orbonalis       | SRR5006982                               | Transcriptome |
| NW_T223 | Pyraloidea     | Crambidae     | Loxostege      | sticticalis     | SRR4905822                               | Transcriptome |
| NW_T172 | Pyraloidea     | Crambidae     | Maruca         | vitrata         | SRR074950                                | Transcriptome |
| NW_T038 | Pyraloidea     | Crambidae     | Myelobia       | smerintha       | SRR1299267                               | Transcriptome |
| NW_T109 | Pyraloidea     | Crambidae     | Ostrinia       | nubilalis       | GAVD00000000                             | Transcriptome |
| NW_T185 | Pyraloidea     | Crambidae     | Scirpophaga    | incertulas      | SRR1615983;<br>SRR1615982;<br>SRR1613323 | Transcriptome |
| NW_T190 | Pyraloidea     | Crambidae     | Spoladea       | recurvalis      | SRR1511612                               | Transcriptome |
| NW_T201 | Pyraloidea     | Pyralidae     | Cadra          | cautella        | SRR1508178                               | Transcriptome |
| NW_T075 | Pyraloidea     | Pyralidae     | Galleria       | melonella       | SRR1021612                               | Transcriptome |
| NW_T114 | Pyraloidea     | Pyralidae     | Plodia         | interpunctella  | ERR426341                                | Transcriptome |
| NW_T084 | Thyridoidea    | Thyrididae    | Pseudothyris   | sepulchralis    | SRR1299495                               | Transcriptome |
| NW_T042 | Thyridoidea    | Thyrididae    | Striglina      | suzukii         | SRR1021625                               | Transcriptome |
| NW_T043 | Thyridoidea    | Thyrididae    | Zeuzerodes     | maculata        | SRR1299209                               | Transcriptome |
| NW_T044 | Tineoidea      | Psychidae     | Thyridopteryx  | ephemeraeformis | SRR1021627                               | Transcriptome |
| NW_T209 | Tineoidea      | Dryadaulidae  | Dryadula       | visaliella      | SRR3180631                               | Transcriptome |
| NW_T211 | Tineoidea      | Meessiidae    | Eudarcia       | simulatricella  | SRR3180633                               | Transcriptome |
| NW_T216 | Tineoidea      | Tineidae      | Tineola        | bisselliella    | SRR3180622                               | Transcriptome |
| NW_T149 | Tortricoidea   | Tortricidae   | Ctenopseustis  | herana          | SRR1165709                               | Transcriptome |
| NW_T045 | Tortricoidea   | Tortricidae   | Cydia          | pomonella       | SRR1021606                               | Transcriptome |
| NW_T137 | Tortricoidea   | Tortricidae   | Epiphyas       | postvittana     | SRR1151338                               | Transcriptome |
| NW_T111 | Tortricoidea   | Tortricidae   | Grapholita     | molesta         | GADK00000000                             | Transcriptome |
| NW_T160 | Tortricoidea   | Tortricidae   | Hedya          | nubiferana      | SRR3476345                               | Transcriptome |
| NW_T047 | Tortricoidea   | Tortricidae   | Phaecasiophora | niveiguttana    | SRR1021604                               | Transcriptome |

|         |                |               |              |              |                 |               |
|---------|----------------|---------------|--------------|--------------|-----------------|---------------|
| NW_T113 | Tortricoidea   | Tortricidae   | Planotortrix | excessana    | SRR1258863      | Transcriptome |
| NW_T115 | Tortricoidea   | Tortricidae   | Rhyacionia   | leptotubula  | DRR012970       | Transcriptome |
| NW_T030 | Urodoidea      | Urodidae      | Urodus       | decens       | SRR1021629      | Transcriptome |
| NW_T031 | Urodoidea      | Urodidae      | Urodus       | parvula      | SRR1299750      | Transcriptome |
| VT11    | Whalleyanoidea | Whalleyanidae | Whalleyana   | vroni        | SRR11799523     | Genome        |
| NW_G001 | Yponomeutoidea | Plutellidae   | Plutella     | xylostella   | GCF_000330985.1 | Genome        |
| NW_T097 | Yponomeutoidea | Yponomeutidae | Yponomeuta   | evonymella   | SRR921659       | Transcriptome |
| NW_T033 | Zygaenoidea    | Dalceridae    | Dalcera      | abrasa       | SRR1299208      | Transcriptome |
| NW_T055 | Zygaenoidea    | Epipyropidae  | Epipomponia  | nawai        | SRR1021611      | Transcriptome |
| NW_T063 | Zygaenoidea    | Lacturidae    | Lactura      | subfervens   | SRR1021626      | Transcriptome |
| NW_T067 | Zygaenoidea    | Limacodidae   | Euclea       | delphinii    | SRR1021597      | Transcriptome |
| NW_T034 | Zygaenoidea    | Megalopygidae | Megalopyge   | crispata     | SRR1021617      | Transcriptome |
| NW_T035 | Zygaenoidea    | Megalopygidae | Megalopyge   | tharops      | SRR1299217      | Transcriptome |
| NW_T036 | Zygaenoidea    | Zygaenidae    | Zygaena      | fausta       | SRR1021632      | Transcriptome |
| NW_T194 | Zygaenoidea    | Zygaenidae    | Zygaena      | filipendulae | SRR023844       | Transcriptome |

**Table S3:** Complete summary of 332 gene recovery for specimens sequenced in this study. Presence of the gene in the dataset is represented by an X. Gene codes corresponds to the codes used with Rota et al (in prep).

| Gene        | VT56 | VT58 | VT57 | MM07227 | VT11 |
|-------------|------|------|------|---------|------|
| 14-3-3E     | -    | -    | -    | -       | X    |
| 2ODHa       | X    | X    | X    | -       | -    |
| 2ODHb       | X    | -    | -    | X       | X    |
| 39SrpL24    | X    | -    | X    | X       | X    |
| 6PFK        | X    | -    | X    | X       | X    |
| 6PGD        | -    | X    | X    | X       | X    |
| ACC         | X    | X    | X    | -       | -    |
| Actin2      | -    | -    | X    | X       | -    |
| acyl        | -    | X    | -    | X       | X    |
| ADF1        | X    | -    | X    | X       | X    |
| ADH         | X    | -    | X    | X       | X    |
| AdK2        | X    | -    | X    | X       | X    |
| ADP-RF1     | -    | -    | -    | -       | -    |
| ADPGK       | -    | X    | X    | X       | X    |
| ADPRF       | X    | X    | X    | X       | X    |
| AFG3        | X    | X    | -    | X       | X    |
| AGBE        | X    | X    | X    | X       | X    |
| AH          | X    | X    | X    | X       | -    |
| Ala         | X    | X    | -    | X       | X    |
| Alb         | X    | -    | X    | X       | X    |
| AK3         | X    | X    | X    | X       | X    |
| Ala         | X    | X    | -    | X       | -    |
| AIDH        | -    | X    | -    | X       | X    |
| ALG2        | X    | -    | -    | X       | -    |
| ANK13C      | X    | X    | -    | X       | X    |
| ArgKin      | X    | X    | X    | X       | -    |
| ATP6        | X    | X    | X    | X       | X    |
| ATPase1     | -    | -    | -    | X       | -    |
| ATPase6     | -    | -    | X    | X       | X    |
| ATPasea     | X    | X    | -    | X       | X    |
| ATPaseAC39  | X    | X    | X    | X       | X    |
| ATPaseb     | X    | X    | -    | X       | X    |
| ATPaseC     | -    | X    | X    | X       | X    |
| ATPaseDelta | X    | X    | X    | X       | X    |
| ATPasee     | X    | -    | X    | X       | -    |
| ATPaseEpsil | X    | X    | -    | -       | -    |
| ATPaseF     | X    | X    | X    | X       | X    |

| Gene   | VT56 | VT58 | VT57 | MM07227 | VT11 |
|--------|------|------|------|---------|------|
| PDHE1  | X    | X    | X    | X       | X    |
| PG     | X    | X    | -    | X       | X    |
| PGK    | X    | -    | X    | X       | -    |
| PGLYM  | X    | X    | X    | X       | -    |
| PIXFT  | -    | X    | X    | -       | X    |
| PK     | X    | X    | X    | X       | X    |
| Pleck  | X    | X    | -    | X       | X    |
| PollI  | X    | X    | X    | X       | X    |
| Porin  | X    | -    | X    | X       | X    |
| ProSup | X    | X    | X    | X       | -    |
| PS     | -    | X    | X    | X       | X    |
| PSb    | -    | X    | X    | X       | X    |
| R5PI   | X    | X    | -    | X       | -    |
| RAB5   | X    | -    | -    | X       | X    |
| Ras    | X    | X    | X    | X       | X    |
| RGNE   | X    | -    | X    | X       | X    |
| RP3E   | -    | -    | -    | -       | -    |
| RPF2   | -    | -    | -    | X       | X    |
| RpL10  | X    | X    | X    | X       | X    |
| RpL10A | X    | X    | X    | X       | X    |
| RpL11  | X    | X    | X    | X       | X    |
| RpL12  | X    | X    | X    | X       | X    |
| RpL13  | X    | X    | -    | X       | X    |
| RpL13A | X    | X    | -    | X       | X    |
| RpL14  | -    | -    | X    | X       | X    |
| RpL15  | X    | X    | X    | X       | X    |
| RpL17  | X    | X    | X    | X       | X    |
| RpL18  | X    | X    | X    | X       | X    |
| RpL18A | -    | X    | X    | X       | -    |
| RpL19  | -    | -    | X    | X       | -    |
| RpL2   | X    | -    | X    | X       | X    |
| RpL20  | X    | X    | X    | X       | X    |
| RpL21  | X    | -    | -    | X       | X    |
| RpL22  | X    | -    | X    | X       | X    |
| RpL23  | X    | X    | X    | X       | X    |
| RpL24  | X    | X    | X    | X       | X    |
| RpL24A | -    | X    | X    | X       | X    |



|            |   |   |   |   |   |
|------------|---|---|---|---|---|
| ATPaseg    | X | - | X | X | - |
| ATPaseH    | X | X | X | - | - |
| ATPaseIa   | - | - | X | X | - |
| ATPaseIb   | - | - | - | X | - |
| ATPaseIc   | - | - | - | X | - |
| ATPaseOS   | X | - | X | X | X |
| ATPaseProt | X | X | X | X | X |
| ATPasesubD | X | - | X | X | X |
| ATPCL      | X | X | X | - | X |
| ATPgamma   | X | X | X | X | X |
| ATreP      | - | X | X | X | - |
| BPx1       | X | X | X | X | X |
| BTB        | X | - | X | X | X |
| Ca-ATPase  | - | - | - | - | - |
| Ca2        | - | X | - | X | X |
| CAD        | X | X | X | X | X |
| CAH        | - | X | X | X | X |
| CDK5       | - | - | X | X | - |
| Chap6a     | X | X | X | X | X |
| CHIP       | - | - | - | X | X |
| chitinase  | X | X | - | X | X |
| CHL        | - | X | X | X | X |
| CMBP5      | X | X | X | X | X |
| COCC       | X | X | - | X | X |
| COI        | X | X | X | X | X |
| COII       | X | X | X | X | X |
| COIII      | X | X | X | X | X |
| COIV       | X | X | X | X | X |
| COP9       | X | X | X | - | X |
| COVa       | X | X | X | X | X |
| COVb       | - | X | X | - | X |
| COVIA1     | X | - | - | X | X |
| COVIlc1    | - | - | X | X | - |
| COX11      | X | X | X | X | X |
| CRc1       | - | X | X | X | X |
| CRis       | - | X | X | X | X |
| CS         | - | X | X | X | - |
| Cullin5    | X | X | X | X | X |
| CycH       | X | - | X | X | X |
| CycY       | - | X | X | X | X |

|        |   |   |   |   |   |
|--------|---|---|---|---|---|
| RpL26  | X | - | X | X | X |
| RpL27  | - | X | X | X | X |
| RpL27A | - | - | X | X | - |
| RpL28  | X | X | X | X | X |
| RpL29  | X | X | - | X | - |
| RpL3   | - | - | X | X | X |
| RpL30  | X | - | X | X | X |
| RpL31  | - | X | - | X | X |
| RpL32  | X | X | X | - | X |
| RpL34  | - | X | X | X | X |
| RpL35  | X | - | X | - | X |
| RpL35A | X | X | X | X | - |
| RpL36  | - | - | X | X | - |
| RpL36A | X | - | X | X | X |
| RpL37  | X | X | - | X | X |
| RpL37A | - | X | X | X | X |
| RpL38  | X | X | X | X | - |
| RpL39  | X | - | X | X | - |
| RpL4   | - | X | - | X | X |
| RpL5   | X | X | X | X | - |
| RpL7   | X | - | X | X | X |
| RpL7A  | X | - | X | X | X |
| RpL8   | - | - | X | X | X |
| RpL9   | X | X | X | X | X |
| RpP0   | X | - | X | X | X |
| RpP1   | X | - | X | X | X |
| RpP2   | - | - | X | X | - |
| RpS10  | - | X | X | X | X |
| RpS11  | X | X | - | X | X |
| RpS12  | - | - | X | X | X |
| RpS13  | X | X | X | X | X |
| RpS14  | X | X | X | X | - |
| RpS15  | X | X | X | X | X |
| RpS15A | X | - | X | X | X |
| RpS16  | X | - | - | X | X |
| RpS17  | X | X | X | X | X |
| RpS18  | X | X | - | X | - |
| RpS19  | X | - | - | X | X |
| RpS2   | - | - | X | X | X |
| RpS20  | X | - | X | X | X |

|         |   |   |   |   |   |
|---------|---|---|---|---|---|
| CysP    | X | X | X | X | - |
| CytB    | X | X | X | X | X |
| CytB9   | X | X | - | - | X |
| CytBc18 | - | - | X | X | - |
| DDB1    | - | X | X | X | X |
| DDC     | X | - | - | X | X |
| DDPS    | X | X | X | X | X |
| DDX10   | X | X | - | X | - |
| DDX23   | - | X | X | X | - |
| DLDH    | X | - | X | X | - |
| DnaJ    | X | X | X | X | X |
| E2C     | - | - | - | X | X |
| EAP30   | - | X | X | X | - |
| EF1a    | X | - | - | X | X |
| EF1gA   | - | X | - | X | - |
| EF1gB   | X | - | - | - | - |
| eno     | X | - | - | X | - |
| Exp1    | - | X | X | X | X |
| F16BA   | X | - | - | X | - |
| F16BP   | X | - | X | X | - |
| FCF1    | X | X | X | X | X |
| FH      | X | X | X | X | X |
| ForKin  | X | X | X | - | - |
| G1PU    | - | X | - | X | X |
| G6P1E   | X | - | X | X | X |
| GAPDH   | X | - | X | X | X |
| gels    | X | - | X | X | X |
| GLYP    | X | X | X | X | X |
| GPD     | X | - | - | X | X |
| GPI     | - | X | X | X | - |
| gpts    | X | - | X | X | X |
| GSS     | X | - | X | - | X |
| GTPb    | X | X | X | X | X |
| GTPCHI  | - | X | X | X | X |
| HBS1    | X | - | X | X | X |
| HCADH   | X | - | - | X | - |
| his     | X | X | X | X | X |
| HK      | - | - | X | X | - |
| IAP     | X | - | X | X | - |
| IDH     | X | X | X | X | X |

|         |   |   |   |   |   |
|---------|---|---|---|---|---|
| RpS21   | X | X | X | X | - |
| RpS23   | X | X | X | X | - |
| RpS24   | - | X | X | X | X |
| RpS25   | - | X | X | X | X |
| RpS26   | X | X | - | X | X |
| RpS27   | X | - | X | X | X |
| RpS27A  | - | X | - | - | X |
| RpS28   | - | - | X | X | X |
| RpS29   | X | X | - | X | X |
| RpS2b   | X | X | - | X | X |
| RpS3    | X | X | X | X | X |
| RpS30   | - | - | - | X | X |
| RpS3A   | - | X | X | X | X |
| RpS4    | X | - | - | - | X |
| RpS5    | X | X | X | X | X |
| RpS6    | - | X | - | X | X |
| RpS7    | X | - | X | X | X |
| RpS8    | X | X | X | X | X |
| RpS9    | X | - | X | X | X |
| RpSA    | X | X | X | X | - |
| RSP1    | X | X | X | X | - |
| SARAH   | X | X | X | X | X |
| SDH     | X | X | X | X | - |
| SDHFS   | X | X | X | X | X |
| SF38A   | - | X | - | X | X |
| SL      | X | X | X | X | X |
| slowmo  | X | X | X | - | X |
| SOD     | - | X | X | X | X |
| SPT16   | - | - | X | X | - |
| Ssu72   | X | - | - | X | X |
| STPP    | X | X | - | X | - |
| SucCL   | X | X | X | X | X |
| SucCoA  | - | X | X | X | X |
| SucCoAb | X | X | X | X | - |
| TA      | X | - | X | - | X |
| TBP     | X | X | - | X | X |
| TfB     | - | - | - | X | X |
| TFIIF   | X | X | X | X | X |
| TFS     | X | - | X | X | X |
| TGF     | X | - | X | X | X |

|          |   |   |   |   |   |
|----------|---|---|---|---|---|
| IDHa     | X | X | - | X | X |
| IDHb     | X | X | - | X | X |
| IDHc     | X | X | X | X | X |
| IEBF     | X | X | X | - | X |
| IF5C     | X | - | X | X | X |
| JHBP     | X | X | X | X | X |
| JM       | X | X | X | - | X |
| KRR1     | X | - | - | X | X |
| LDH      | - | - | X | - | X |
| LeuZip   | X | X | - | X | X |
| LIS      | - | - | X | X | - |
| LPL      | - | - | X | X | X |
| luc7     | X | X | X | - | - |
| M1PD     | X | X | X | X | X |
| MalDH    | X | - | - | X | X |
| MaNa     | X | X | X | X | X |
| MDH      | X | X | X | X | X |
| MedPolII | X | X | X | X | X |
| MK6      | X | X | X | X | X |
| MMP41    | X | X | - | X | X |
| MPP2     | X | X | X | X | X |
| NAT10    | X | X | - | X | X |
| NC       | X | X | X | X | X |
| ND1      | X | X | X | X | X |
| ND1a1    | X | X | X | - | X |
| ND1a10   | X | X | X | - | X |
| ND1a12   | X | - | - | X | - |
| ND1a13   | X | X | - | X | X |
| ND1a2    | - | X | - | X | X |
| ND1a4    | - | - | X | X | - |
| ND1a5    | - | - | X | X | X |
| ND1a6    | X | X | X | X | X |
| ND1a7    | - | X | - | - | X |
| ND1a8    | - | X | X | - | - |
| ND1a9    | X | X | X | X | - |
| ND1ab1   | X | X | - | X | X |
| ND1b1    | X | - | - | X | X |
| ND1b10   | X | X | - | X | - |
| ND1b5    | X | - | X | X | X |
| ND1b6    | - | X | - | X | X |

|         |   |   |   |   |   |
|---------|---|---|---|---|---|
| TIF2A   | X | X | X | X | X |
| TIF3B   | X | X | X | X | X |
| TIF3Ca  | X | X | - | X | X |
| TIF3Cb  | - | X | X | X | X |
| TIF3K   | X | X | X | X | X |
| TIF3M   | X | X | X | X | - |
| TIF4A   | X | - | X | X | X |
| TIF5A   | - | - | X | X | - |
| TIF6    | - | X | X | X | X |
| TK      | X | - | X | - | - |
| TP50A   | X | - | X | X | X |
| TPI     | X | X | X | X | X |
| TPPC11  | - | - | X | X | X |
| Treh-2  | - | - | - | - | - |
| Trop    | X | X | X | X | X |
| TRP     | - | - | - | X | - |
| U1A     | X | X | X | X | X |
| U5      | - | X | X | X | - |
| UBCc    | X | X | X | X | X |
| UCCR7   | X | X | X | X | - |
| UCTH    | X | X | - | X | X |
| UDPG6DH | X | X | X | X | X |
| UDPGAD  | X | X | X | X | X |
| UnP     | X | X | X | X | - |
| vacA    | X | X | - | X | X |
| vacATPc | - | X | X | X | - |
| vacATPd | - | X | X | X | X |
| vacATPE | X | X | X | X | X |
| vacATPF | X | - | X | X | X |
| vacATPg | X | X | X | X | X |
| vacATPH | X | X | X | X | X |
| vacB    | X | - | - | X | - |
| VATPc   | X | - | - | X | X |
| VPS26   | X | X | X | X | X |
| VPS4    | - | X | X | X | X |
| WD40    | X | X | X | X | X |
| WPH     | X | X | - | X | X |
| ZN330   | X | - | - | X | X |

|        |   |   |   |   |   |
|--------|---|---|---|---|---|
| ND1b9  | X | - | X | X | - |
| ND2    | X | - | X | X | X |
| ND3    | X | X | X | X | X |
| ND4    | X | X | X | X | X |
| ND4L   | X | X | X | X | X |
| ND5    | X | X | X | X | X |
| NDF1   | X | X | X | X | X |
| NDF2   | X | X | - | X | X |
| NDFS1  | - | - | X | - | - |
| NDFS2  | X | X | - | X | X |
| NDFS3  | X | - | - | X | X |
| NDFS7  | X | X | X | X | X |
| NDFS8  | X | X | - | X | X |
| NEDD8  | X | X | X | X | X |
| Nex9   | X | X | X | X | X |
| nGTPb1 | X | - | X | X | X |
| NIDH   | X | - | X | X | X |
| NIF3   | X | X | - | X | X |
| NMD3   | - | - | X | X | X |
| nuc56  | X | X | X | X | X |
| nuc58  | - | X | - | X | - |
| OSGEP  | X | - | X | X | X |
| P26S12 | X | - | - | X | X |
| P26S4  | X | - | X | X | X |
| PCNA   | - | - | X | X | X |
| PDH    | X | - | X | - | - |
